# Supplementary material for: From fibrous elastin proteins to one-dimensional transition metal phosphides and their applications
Source: Royal Society of Chemistry journal article supplement (doi:10.1039/c6ta04150g), 2016-01-01
Supplement: c6ta04150g1.pdf [file c6ta04150g1.pdf]

## Supporting Information

### From Fibrous Elastin Protein to One-dimensional Transition Metal Phosphide and Their Applications

Guilue Guo,<sup>a</sup> Yuanyuan Guo,<sup>a</sup> Huiteng Tan,<sup>a</sup> Hong Yu,<sup>a</sup> Weihan Chen,<sup>a</sup> Eileen Fong,<sup>\*a</sup>  
Qingyu Yan<sup>\*ab</sup>

<sup>a</sup>School of Materials Science and Engineering, Nanyang Technological University, 50 Nanyang Avenue,  
639798, Singapore

<sup>b</sup>Energy Research Institute@NTU, Nanyang Technological University, 50 Nanyang Drive, 639798, Singapore

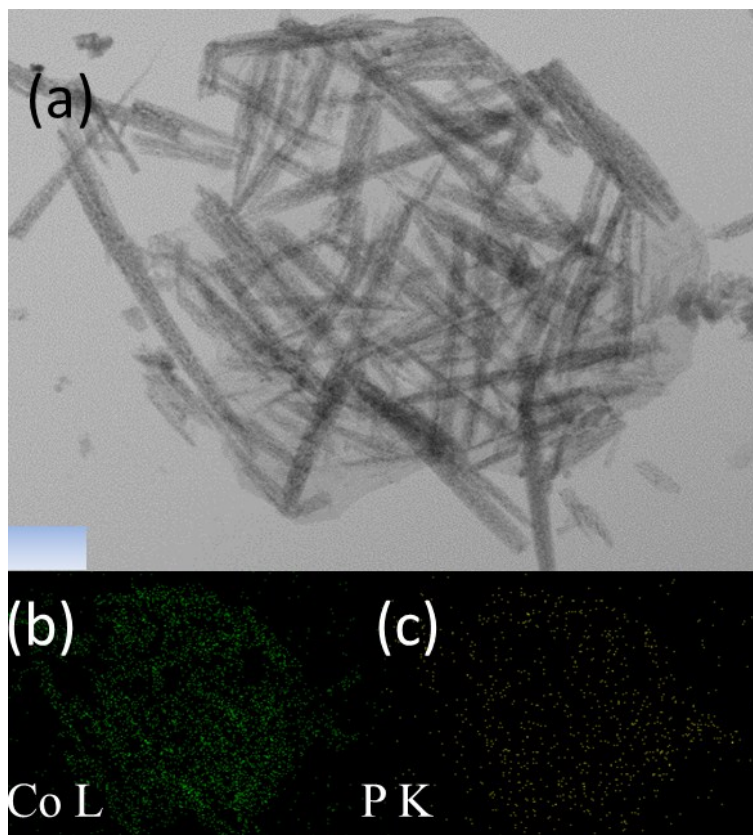

Fig. S1 Elemental mapping of 1D CoP, scale bar in a: 200 nm

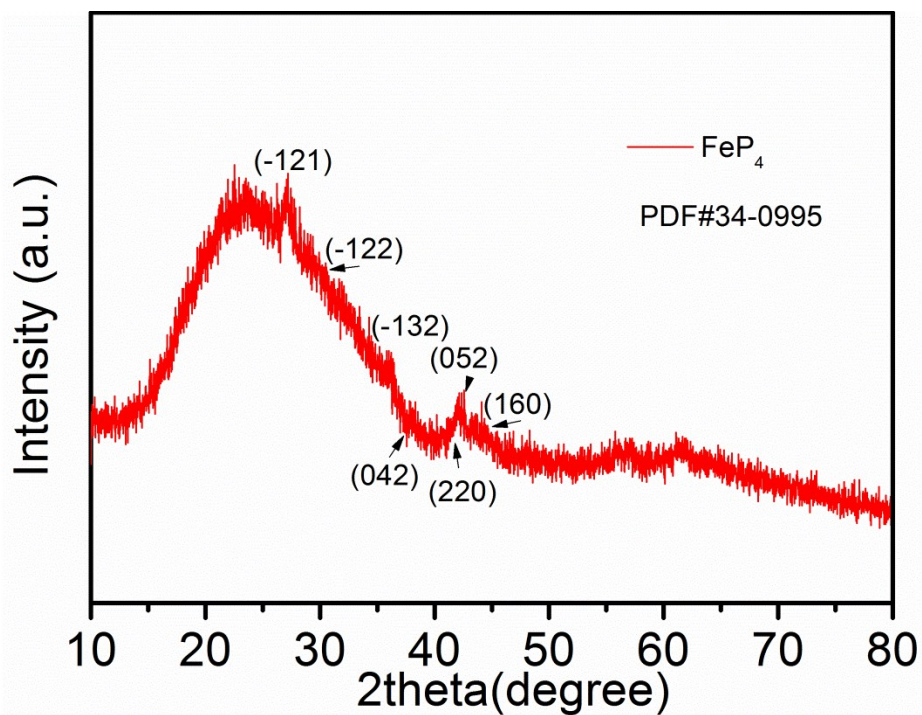

Fig. S2 XRD spectrum of 1D FeP<sub>4</sub>.

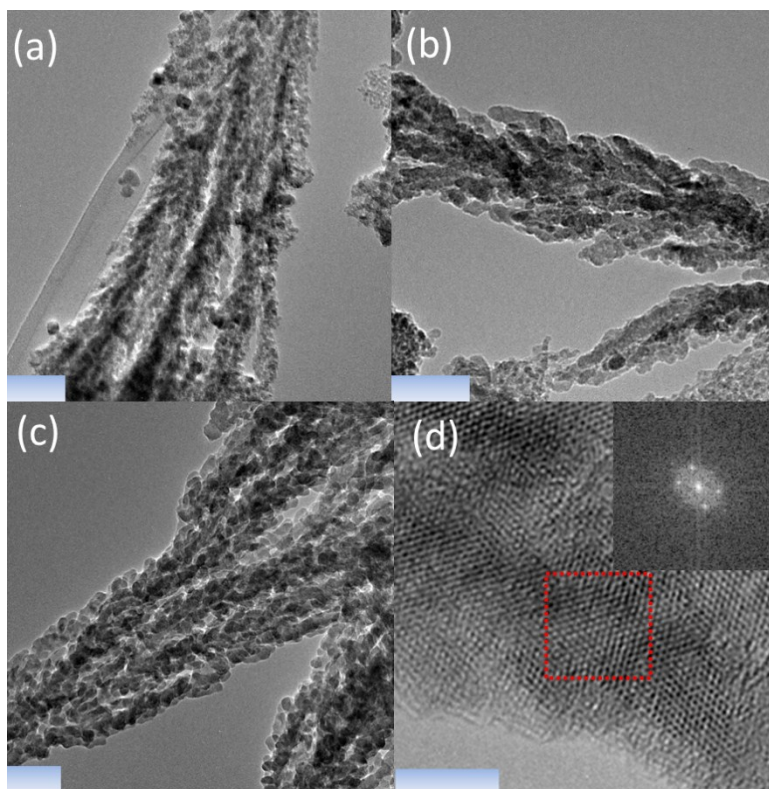

Fig. S3 TEM characterization of 1D FeP<sub>4</sub>. Scale bar: (a) 100 nm. (b-c) 50 nm. (d): 2 nm.

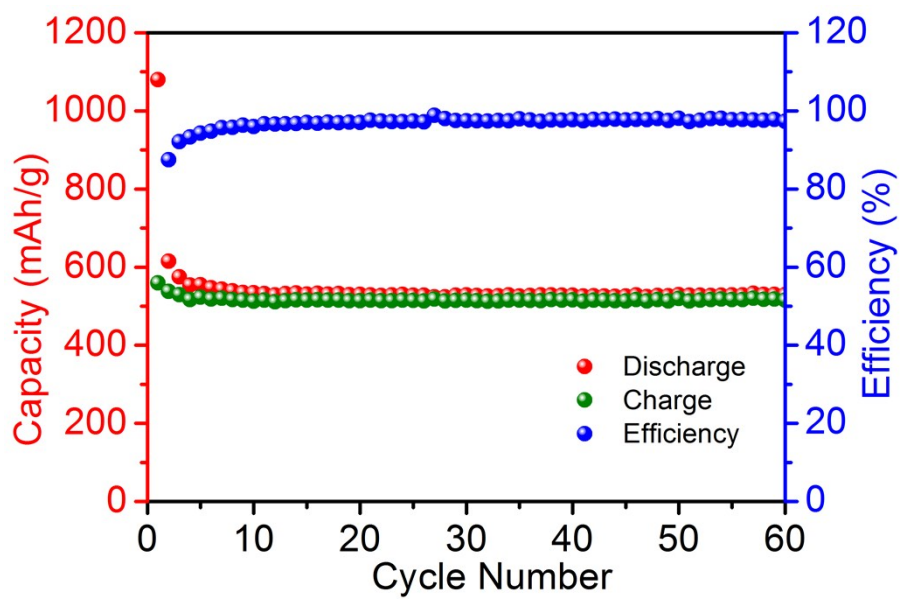

Fig. S4 Cycling performance of SIB based on 1D CoP at 0.1 C.

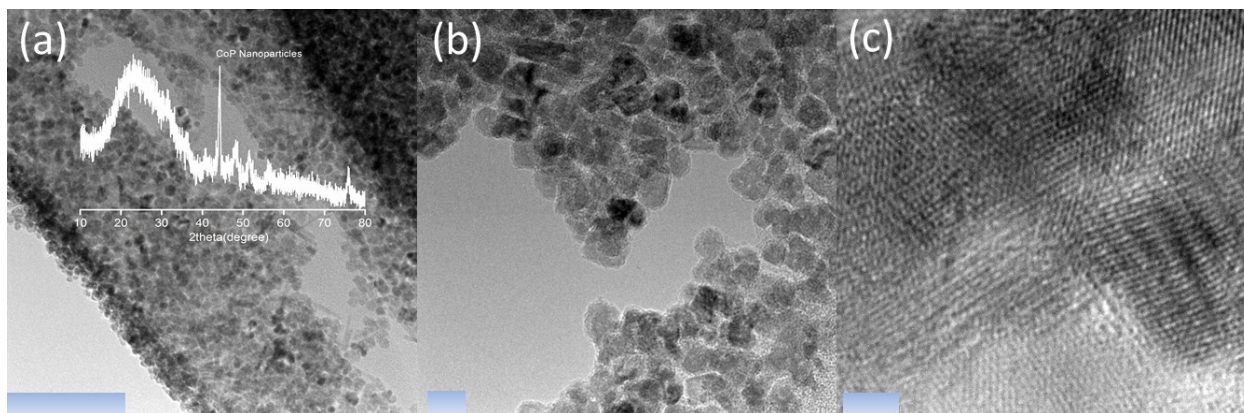

Fig. S5 CoP nanoparticles. Scale bars: (a) 100 nm; (b) 10 nm; (c) 2 nm.

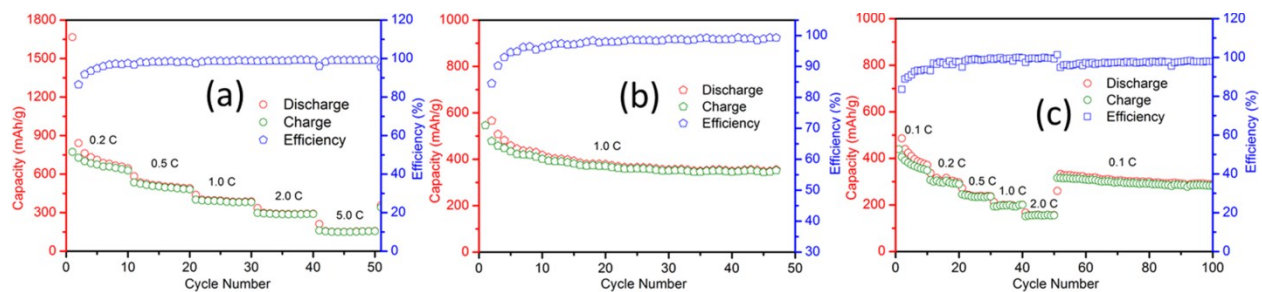

Fig. S6 Lithium and sodium storage performance of CoP nanoparticles: (a) rate capability of lithium storage; (b) cycling performance of lithium storage; (c) rate capability of sodium storage.
